# Supplementary material for: Incidence of newly diagnosed diabetes after Covid-19
Source: Springer Nature journal article supplement (doi:10.1007/s00125-022-05670-0), 2022-03-16

**Electronic Supplemental Material** for Rathmann W, et al.  
**“Incidence of newly diagnosed diabetes after Covid-19”**

**ESM Table 1.** Baseline characteristics of people with Covid-19 and acute upper respiratory tract infections (AURI): Disease Analyzer primary care database

| <b>Variables</b>                       | <b>Covid-19<br/>(N, %)</b> | <b>AURI<br/>(N, %)</b> |
|----------------------------------------|----------------------------|------------------------|
| N                                      | 35,865                     | 35,865                 |
| Age (mean, SD) years                   | 42.6 (19.1)                | 42.6 (19.1)            |
| Age 18-30 years                        | 10,816 (30.2)              | 10816 (30.2)           |
| Age 31-40 years                        | 6500 (18.1)                | 6500 (18.1)            |
| Age 41-50 years                        | 6133 (17.1)                | 6133 (17.1)            |
| Age 51-60 years                        | 6631 (18.5)                | 6631 (18.5)            |
| Age 61-70 years                        | 2932 (8.2)                 | 2932 (8.2)             |
| Age >70 years                          | 2853 (7.9)                 | 2853 (7.9)             |
| Female                                 | 16,362 (45.6)              | 16,370 (45.6)          |
| Private health insurance coverage      | 1358 (3.8)                 | 1359 (3.8)             |
| Obesity (E66)                          | 1545 (4.3)                 | 1545 (4.3)             |
| Hypertension (I10)                     | 5062 (14.1)                | 5059 (14.1)            |
| Lipid metabolism disorders (E78)       | 2772 (7.7)                 | 2775 (7.7)             |
| Stroke (G45, I63, I64)                 | 143 (0.4)                  | 144 (0.4)              |
| Myocardial infarction (I21-I23, I25.2) | 72 (0.2)                   | 74 (0.2)               |
| <i>Index month (Covid-19, AURI)</i>    |                            |                        |
| March 2020                             | 380 (1.1)                  | 402 (1.1)              |
| April 2020                             | 1535 (4.3)                 | 1539 (4.3)             |
| May 2020                               | 855 (2.4)                  | 857 (2.4)              |
| June 2020                              | 641 (1.8)                  | 641 (1.8)              |
| July 2020                              | 869 (2.4)                  | 873 (2.4)              |
| August 2020                            | 1382 (3.9)                 | 1385 (3.9)             |
| September 2020                         | 1377 (3.8)                 | 1381 (3.8)             |
| October 2020                           | 4232 (11.8)                | 4232 (11.8)            |
| November 2020                          | 8529 (23.8)                | 8521 (23.8)            |
| December 2020                          | 9742 (27.1)                | 9725 (27.1)            |
| January 2021                           | 6323 (17.6)                | 6309 (17.6)            |

**ESM Table 2.** Incidence and incidence rate ratio of newly diagnosed diabetes after Covid-19 or acute upper respiratory tract infections (AURI)

| ICD-10 code                                   | Diabetes incidence per 1000 person-years (n) |             | IRR for Covid-19 vs AURI<br>(95% CI) |
|-----------------------------------------------|----------------------------------------------|-------------|--------------------------------------|
|                                               | Covid-19 cohort                              | AURI cohort |                                      |
| E11 (type 2 diabetes)                         | 20.5 (65)                                    | 13.6 (50)   | 1.51 (1.05-2.18)                     |
| E12–E14 (other forms or unspecified diabetes) | 4.7 (15)                                     | 3.7 (14)    | 1.25 (0.60-2.59)                     |

AURI with a recorded SARS-CoV 2 test without having ICD-10 code U07.1 within a time interval of 7 days before to 7 days after the index date of AURI diagnosis were selected (n=9823). The Covid-19 and AURI cohorts were matched (1:1) for sex, age, health insurance coverage, index month and comorbidity (obesity, hypertension, hyperlipidaemia, myocardial infarction, stroke).

Incidence refers to newly diagnosed diabetes 1-365 days after the index date.

IRR were estimated using Poisson regression accounting for different observation durations

**ESM Figure 1** Flow chart of study (Disease Analyzer database)

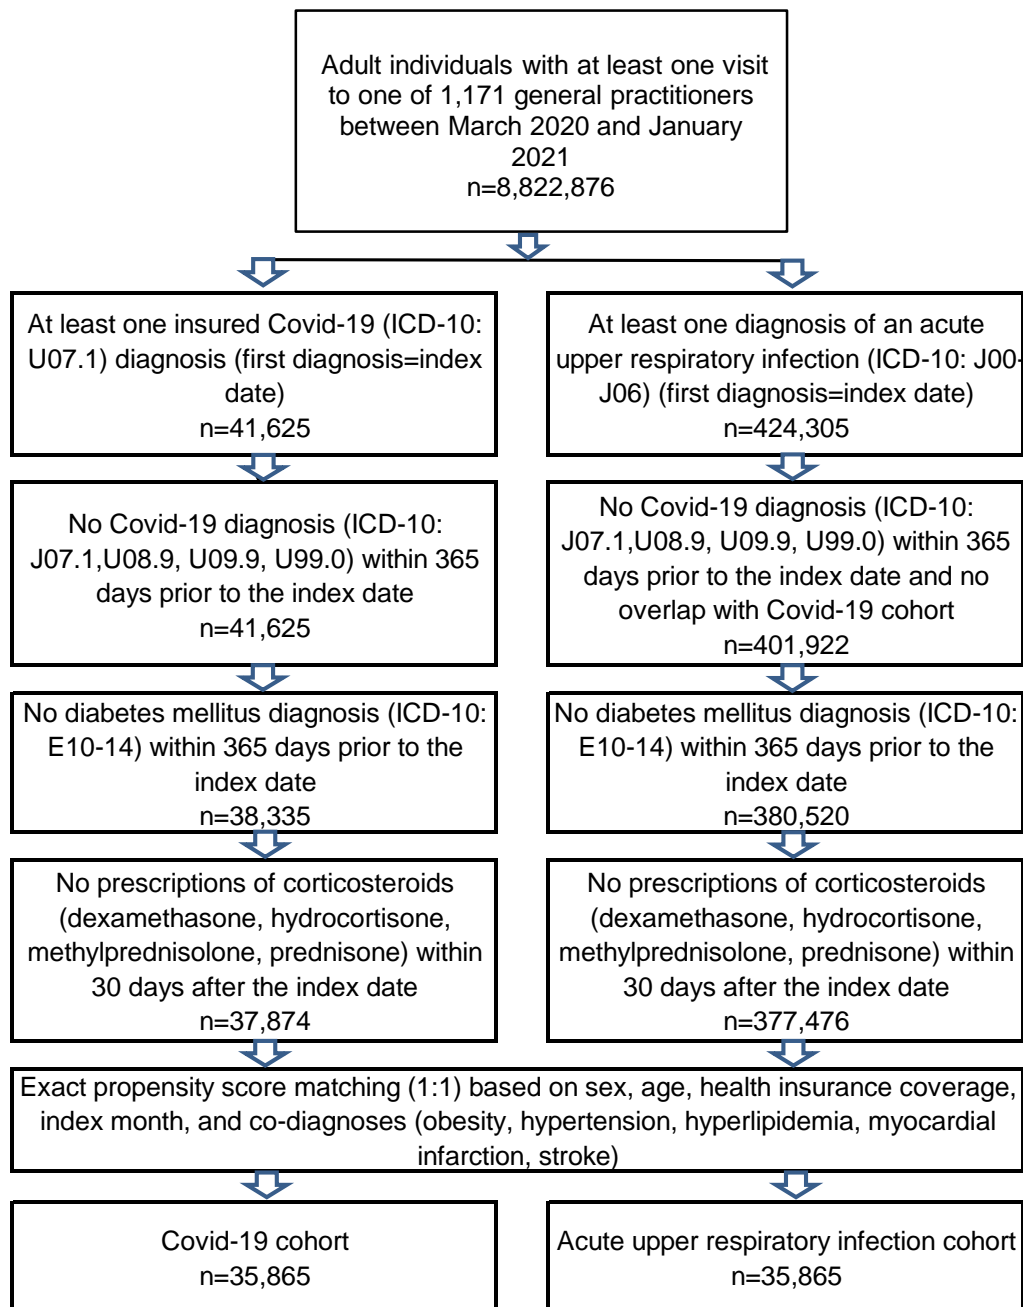

Supplement: MOESM1 [file 20224870]
